# Supplementary material for: The disturbance of thyroid-associated hormone and its receptors in brain and blood circulation existed in the early stage of mouse model of Alzheimer’s disease
Source: publisher site journal article supplement (doi:10.18632/aging.204570), 2023-03-07
Supplement: Supplementary file [file aging-v15i5-204570-supplementary-material-SD2.pdf]

## SUPPLEMENTARY FIGURE

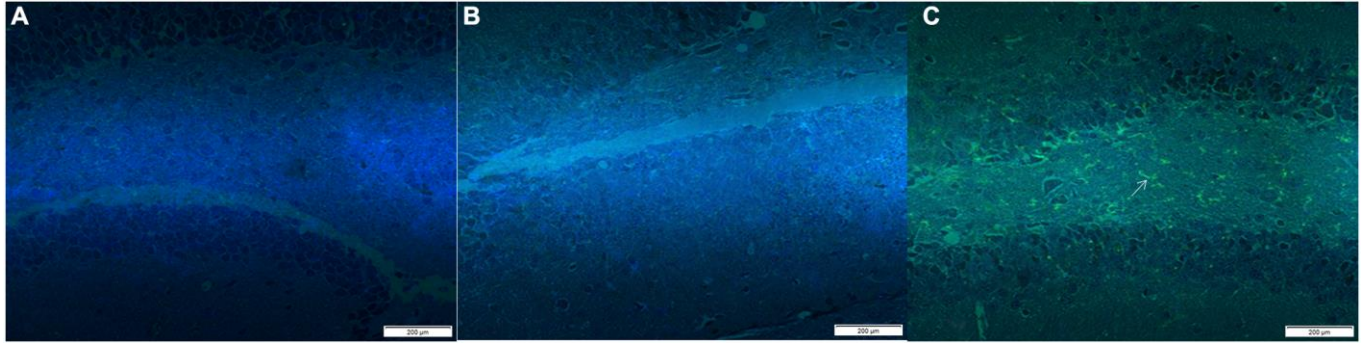

**Supplementary Figure 1. Results of immunofluorescent staining of A $\beta$  in hippocampus of mice.** After the injection of okadaic acid (0.1  $\mu$ M, 5  $\mu$ L) into the hippocampus for 2 weeks, the expression of A $\beta$  in the hippocampus of mice showed little irregular patchy green fluorescence in the interstitium of the normal group (A) and the control group (B), while the irregular patchy green fluorescence was abundant and strong in the interstitium of the OA treatment group (C). Normal: mice without directional puncture; Control group: Mice were injected with 5  $\mu$ L normal saline through stereotactic puncture. (x 20).
